# Supplementary material
Source: publisher figshare collection journal article supplement (https://sage.figshare.com/ndownloader/files/22896986)

Figure 1. Forest plot of the difference in cervical range-of-motion between baseline and follow-up.
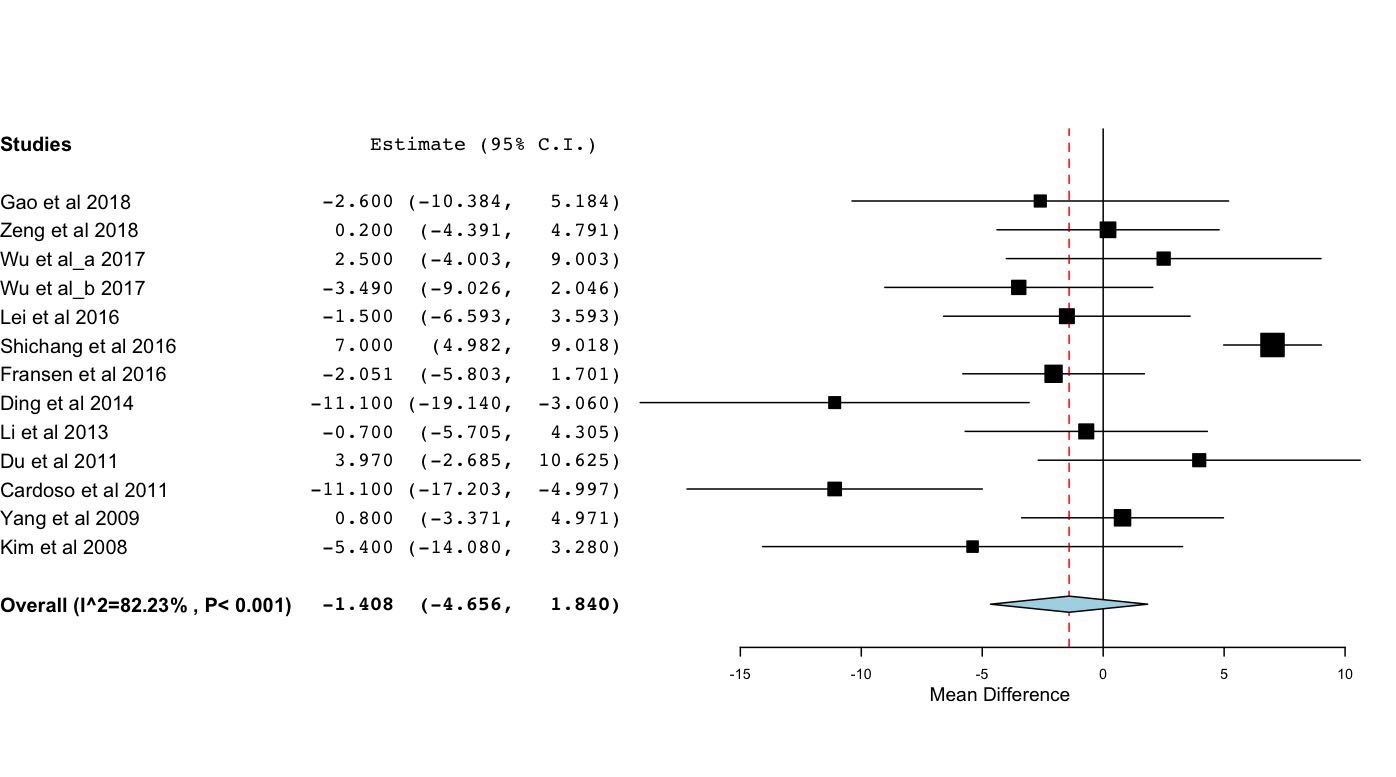


Figure 2. Forest plot of the difference in C2/C7 Cobb angle between baseline and follow-up.
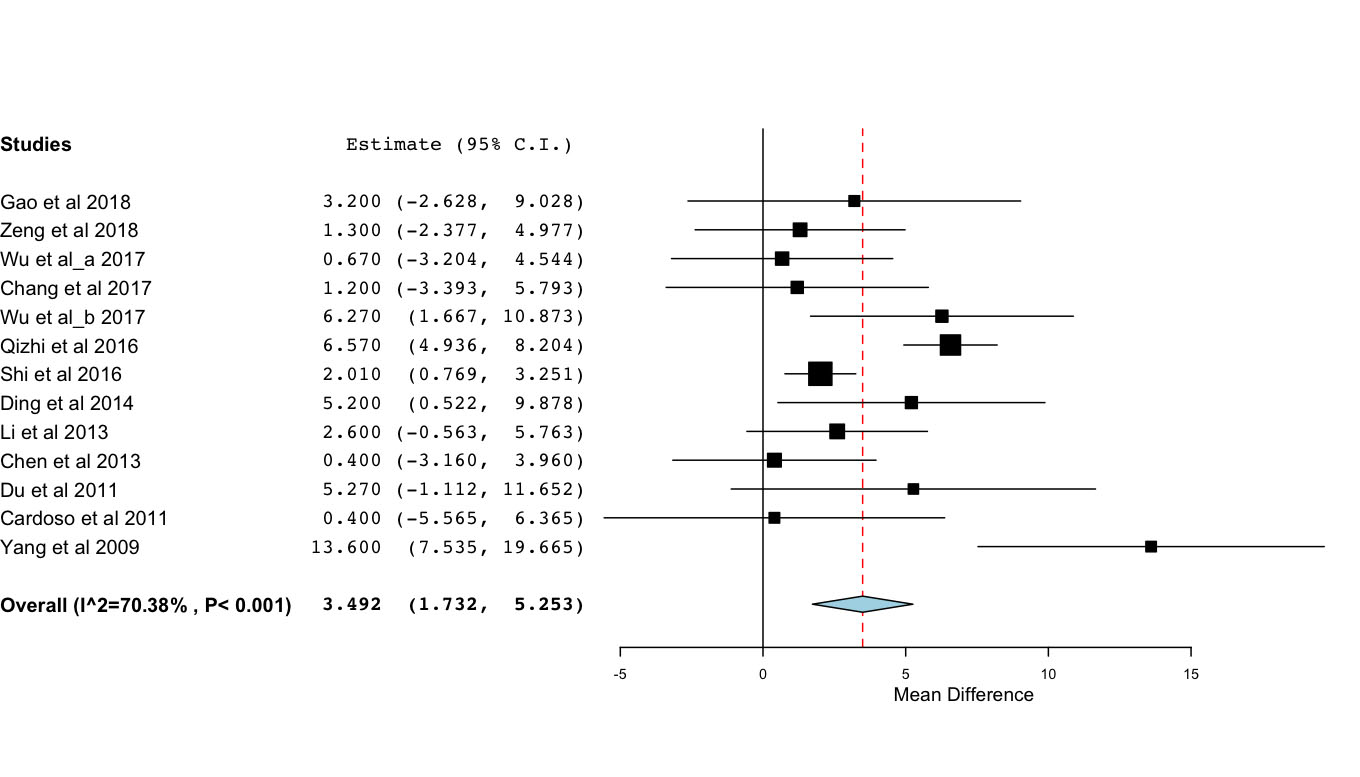


Figure 3. Forest plot of the difference in functional spinal unit angle between baseline and follow-up.
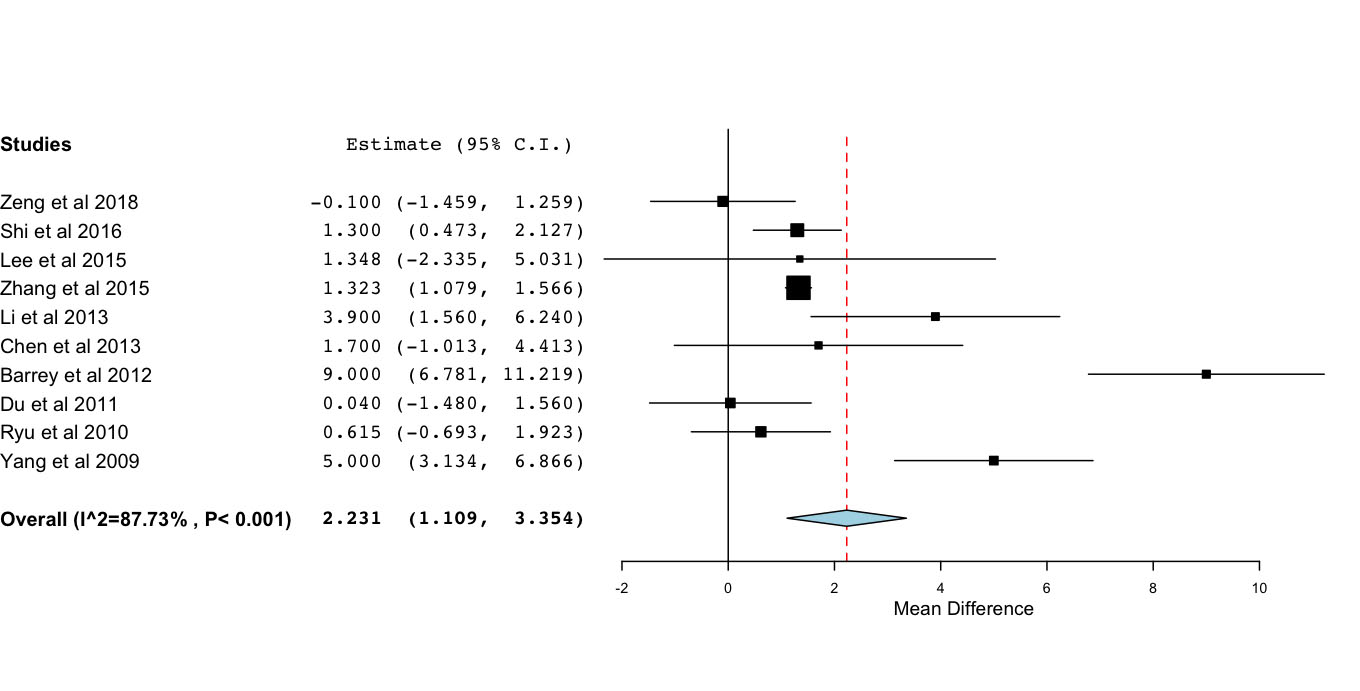


Figure 4. Forest plot of the difference in functional spinal unit range-of-motion between baseline and follow-up.
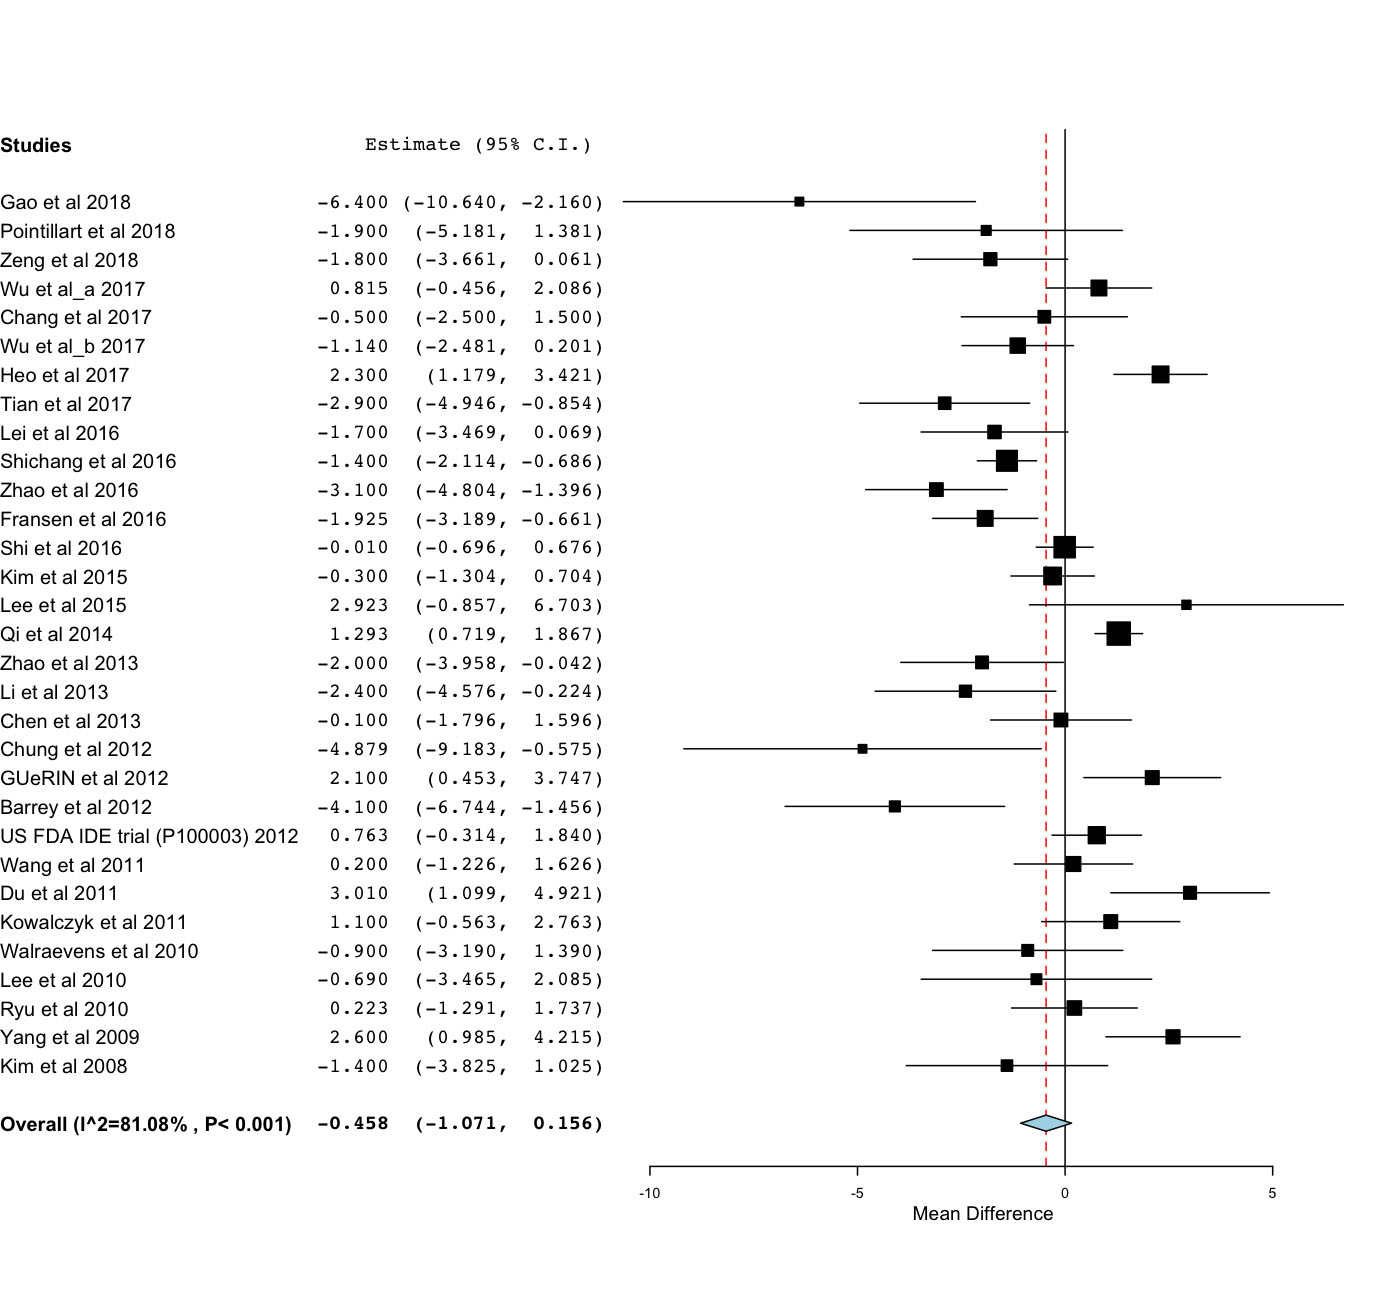


Figure 5. Forest plot of the difference in range-of-motion of the inferior spinal segment between baseline and follow-up.
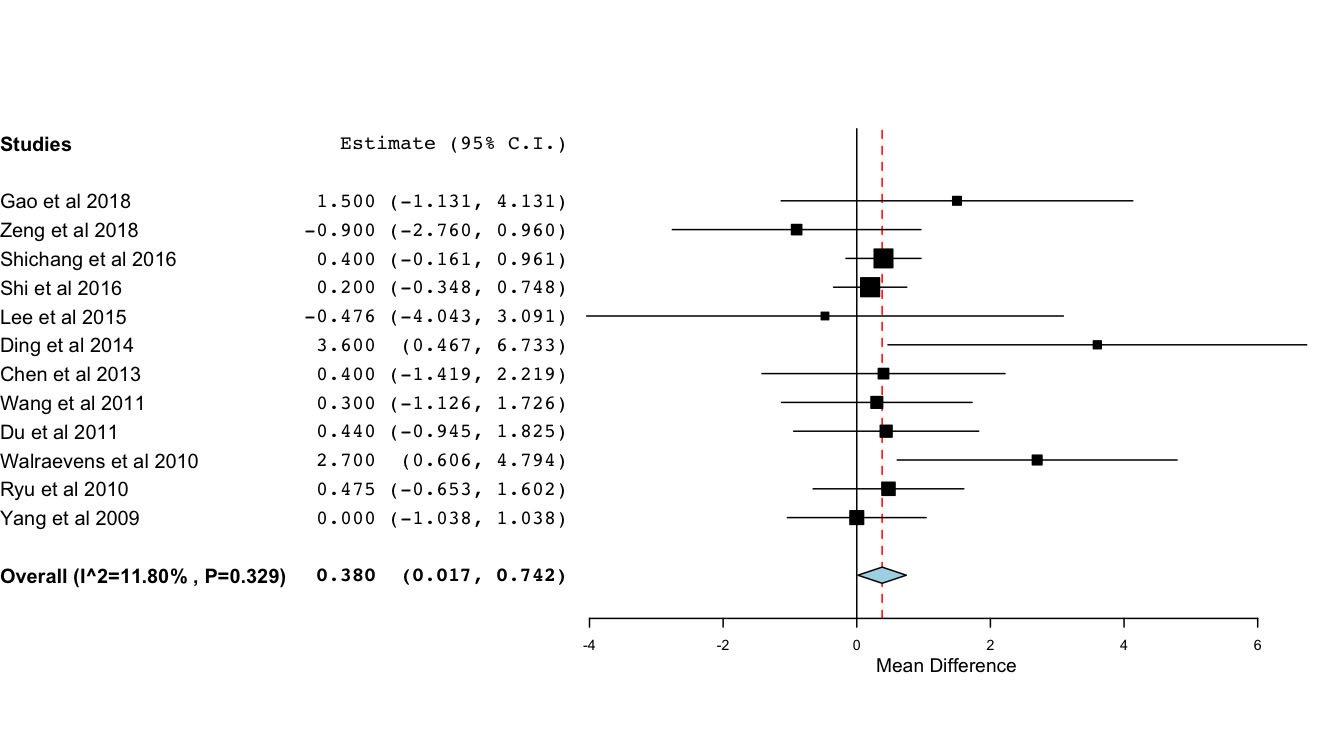


Figure 6. Forest plot of the difference in range-of-motion of the superior spinal segment between baseline and follow-up.
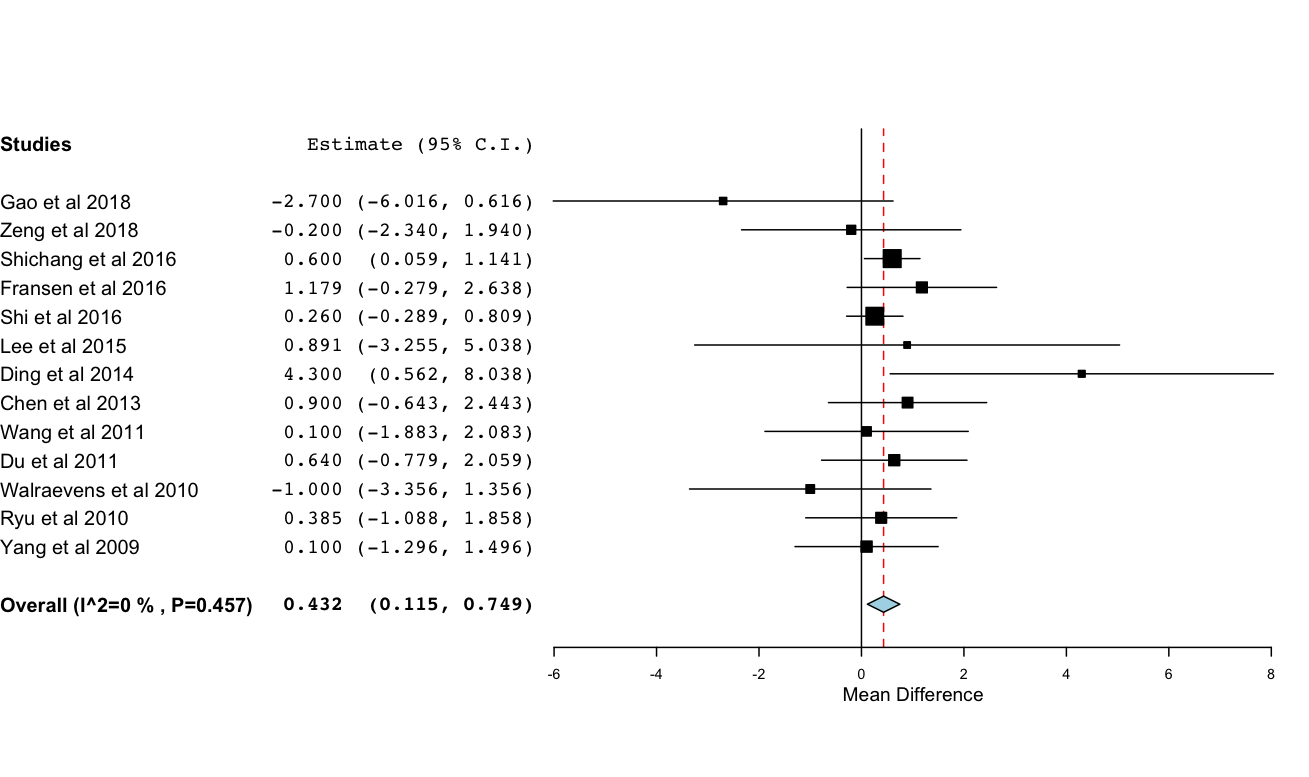

Supplement: Supplementary file 1 [file 22896986]
